# Supplementary material
Source: Springer Nature journal article supplement (https://www.springerprofessional.de/resource/supplementary/13638_2012_613_MOESM12_ESM.pdf/11898360)

**a**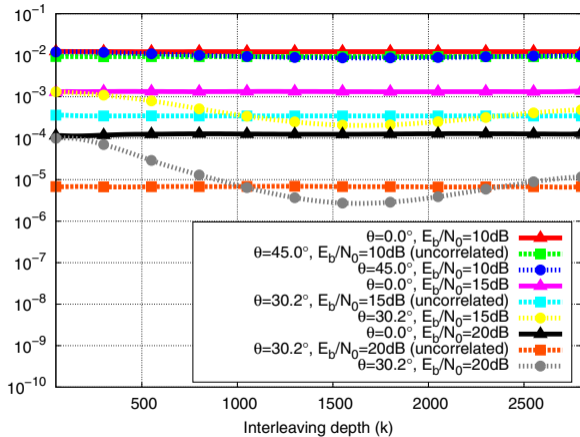**b**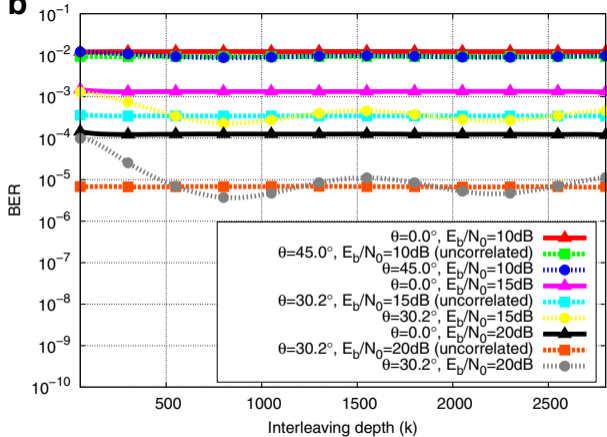

Supplement: MOESM12 [file 11898360]
